# Supplementary material for: Selective CO2 reduction to HCOOH on a Pt/In2O3/g-C3N4 multifunctional visible-photocatalyst
Source: Royal Society of Chemistry journal article supplement (doi:10.1039/d0ra03959d), 2020-01-01
Supplement: d0ra03959d1.pdf [file d0ra03959d1.pdf]

## Supporting Information

### Selective CO<sub>2</sub> reduction to HCOOH on a Pt/In<sub>2</sub>O<sub>3</sub>/g-C<sub>3</sub>N<sub>4</sub> multifunctional visible-photocatalyst

Jiehong He, Pin Lv, Jian Zhu\*, Hexing Li\*

Education Ministry Key and International Joint Lab of Resource Chemistry and  
Shanghai Key Laboratory of Rare Earth Functional Materials, Department of  
Chemistry, Shanghai Normal University, Shanghai 200234, China.

\*Corresponding authors. Tel: +86 21 64322272; Fax: +86 21 64322272.

*E-mail address:* [hexing-li@shnu.edu.cn](mailto:hexing-li@shnu.edu.cn) (Hexing Li)

[jianzhu@shnu.edu.cn](mailto:jianzhu@shnu.edu.cn) (Jian Zhu)

**Table S1** Theoretical and real In<sub>2</sub>O<sub>3</sub>-content and Pt-loading in mass percentage.

| Sample                              | In <sub>2</sub> O <sub>3</sub> -content (%) |       | Pt-loading (%) |      |
|-------------------------------------|---------------------------------------------|-------|----------------|------|
|                                     | Theoretical                                 | Real  | Theoretical    | Real |
| 2Pt-In <sub>2</sub> O <sub>3</sub>  | 98.04                                       | /     | 1.96           | 1.92 |
| 2Pt-g-C <sub>3</sub> N <sub>4</sub> | 0                                           | 0     | 1.96           | 1.98 |
| 1Pt-10INC�                          | 9.09                                        | 8.88  | 0.99           | 0.87 |
| 1.5Pt-10INC�                        | 9.09                                        | 9.13  | 1.48           | 1.45 |
| 2Pt-10INC�                          | 9.09                                        | 9.03  | 1.96           | 1.95 |
| 2.5Pt-10INC�                        | 9.09                                        | 8.95  | 2.44           | 2.46 |
| 2Pt-5INC�                           | 4.76                                        | 4.51  | 1.48           | 1.44 |
| 2Pt-15INC�                          | 13.04                                       | 13.12 | 1.48           | 1.51 |
| 2Pt-20INC�                          | 16.67                                       | 16.51 | 1.48           | 1.32 |
| 2Pt-10INC�-mix                      | 9.09                                        | 9.12  | 1.48           | 1.44 |

**Table S2** Structural parameters determined from N<sub>2</sub> adsorption-desorption isotherms.

| Catalyst                             | Surface area (m <sup>2</sup> /g) | Pore Size (nm) | Pore volume (cm <sup>3</sup> /g) |
|--------------------------------------|----------------------------------|----------------|----------------------------------|
| In <sub>2</sub> O <sub>3</sub>       | 31.18                            | 21.18          | 0.039                            |
| g-C <sub>3</sub> N <sub>4</sub>      | 14.02                            | 19.31          | 0.043                            |
| 5INC�                                | 32.51                            | 11.97          | 0.169                            |
| 10INC�                               | 25.32                            | 13.29          | 0.104                            |
| 15INC�                               | 23.84                            | 15.82          | 0.170                            |
| 20INC�                               | 28.36                            | 12.67          | 0.109                            |
| 1Pt-10INC�                           | 15.66                            | 21.70          | 0.066                            |
| 1.5Pt-10INC�                         | 13.27                            | 22.20          | 0.074                            |
| 2Pt-10INC�                           | 13.10                            | 22.86          | 0.075                            |
| 2.5Pt-10INC�                         | 7.642                            | 27.28          | 0.052                            |
| 2Pt- In <sub>2</sub> O <sub>3</sub>  | 10.33                            | 24.06          | 0.061                            |
| 2Pt- g-C <sub>3</sub> N <sub>4</sub> | 6.980                            | 27.58          | 0.048                            |
| 2Pt-5INC�                            | 18.64                            | 23.95          | 0.112                            |
| 2Pt-15INC�                           | 11.20                            | 22.60          | 0.065                            |
| 2Pt-20INC�                           | 11.03                            | 22.01          | 0.073                            |
| 2Pt-10INC�-mix                       | 5.365                            | 29.25          | 0.039                            |

**Table S3** Energy bandgap (E<sub>g</sub>) and calculated light absorbance edge wavelength (λ).

| Catalyst                            | E <sub>g</sub> /eV | λ/nm |
|-------------------------------------|--------------------|------|
| g-C <sub>3</sub> N <sub>4</sub>     | 2.83               | 438  |
| In <sub>2</sub> O <sub>3</sub>      | 2.91               | 426  |
| 5INC�                               | 2.74               | 453  |
| 10INC�                              | 2.75               | 451  |
| 15INC�                              | 2.76               | 449  |
| 20INC�                              | 2.77               | 448  |
| 2Pt-g-C <sub>3</sub> N <sub>4</sub> | 2.73               | 454  |
| 2Pt-In <sub>2</sub> O <sub>3</sub>  | 2.78               | 446  |
| 2Pt-5INC�                           | 2.68               | 463  |
| 2Pt-10INC�                          | 2.65               | 468  |
| 2Pt-15INC�                          | 2.62               | 473  |
| 2Pt-20INC�                          | 2.62               | 473  |

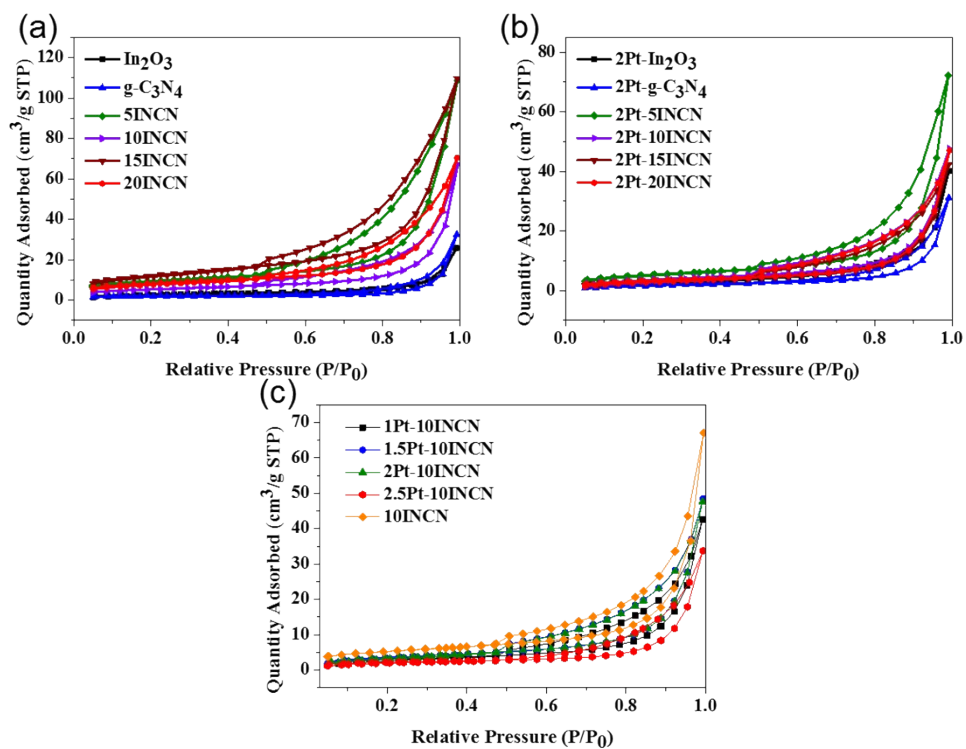

**Fig. S1**  $N_2$  adsorption-desorption isotherms of pure  $In_2O_3$ , pure  $g-C_3N_4$  and their corresponding composites with or without Pt-loading.

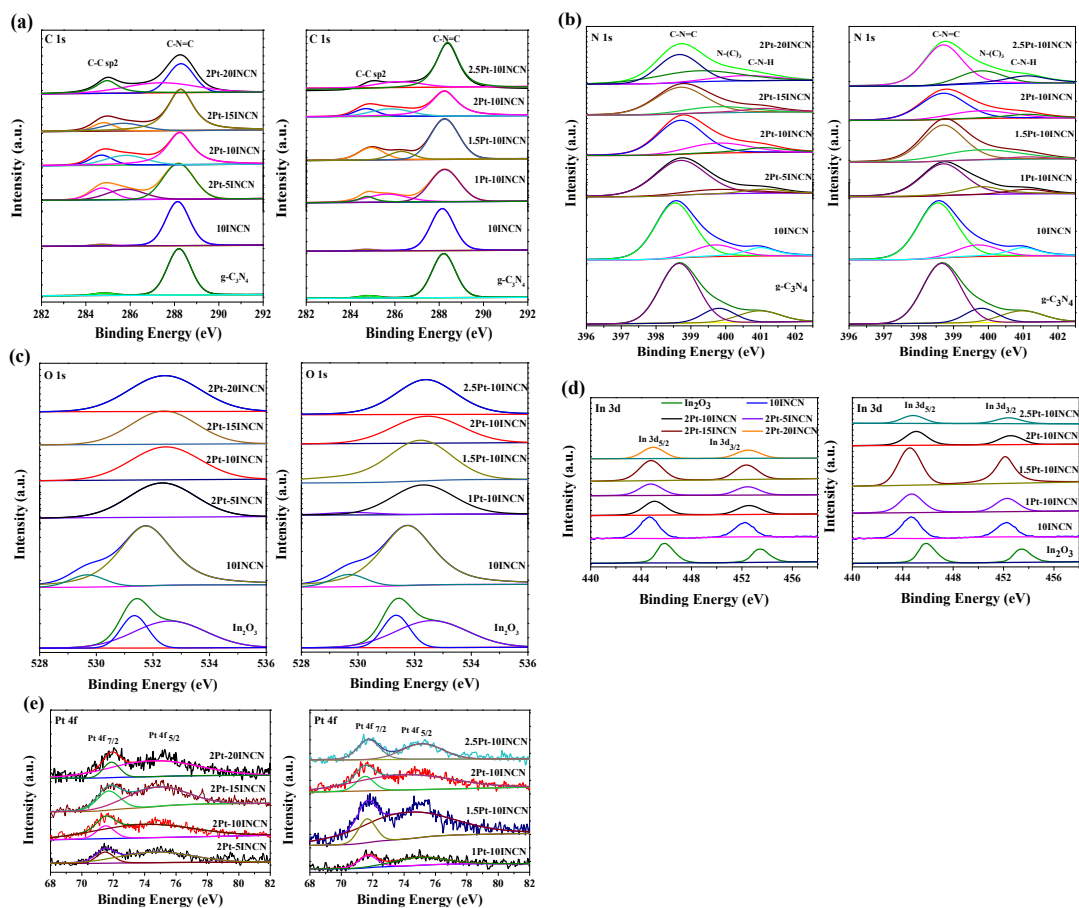

**Fig. S2** XPS spectra in (a) C 1s, (b) N 1s, (c) O 1s, (d) In 3d, and (e) Pt 4f levels.

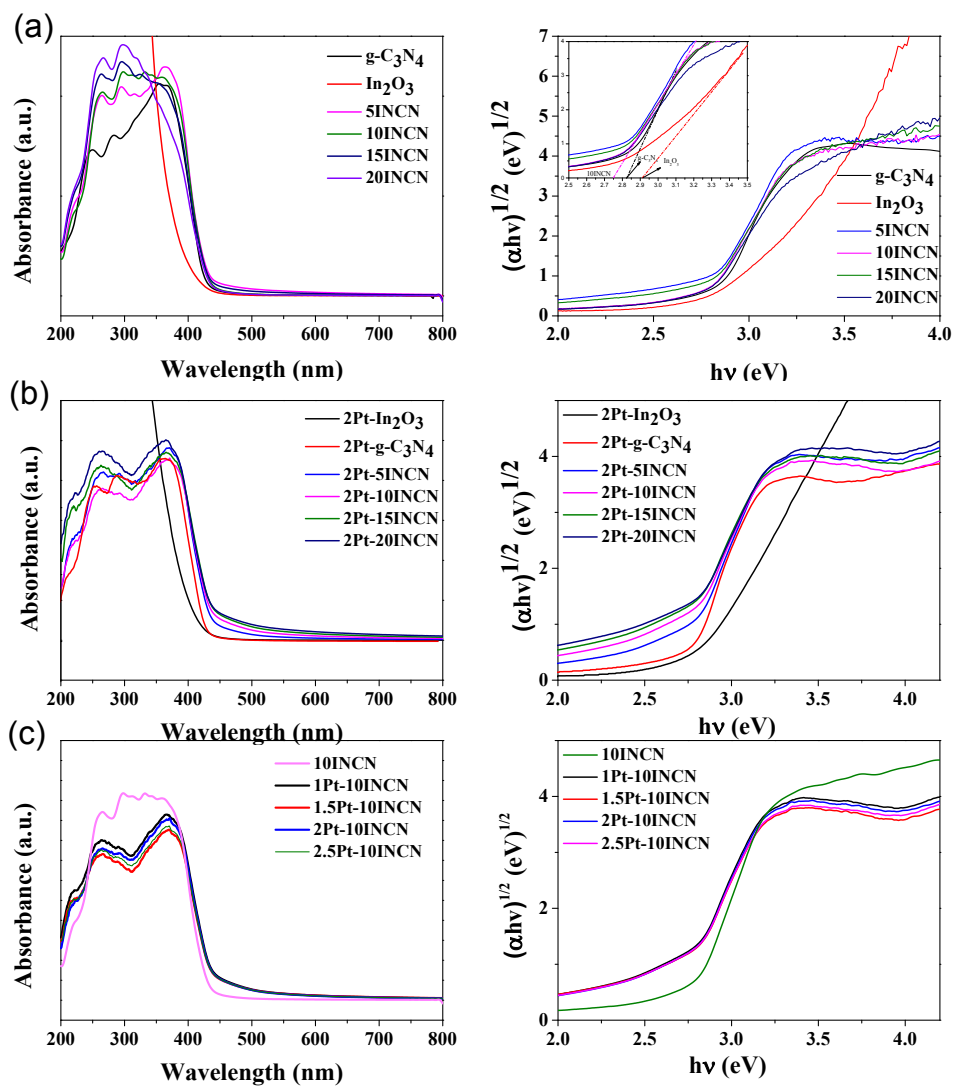

**Fig. S3** UV-Vis DRS spectra and plots of  $(\alpha h\nu)^{1/2}$  vs. photon energy ( $h\nu$ ).

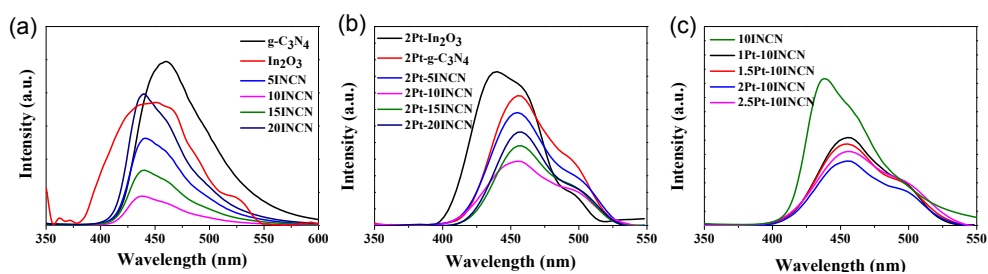

**Fig. S4** PL spectra obtained at  $\lambda_{\text{ex}}$  of 350 nm.

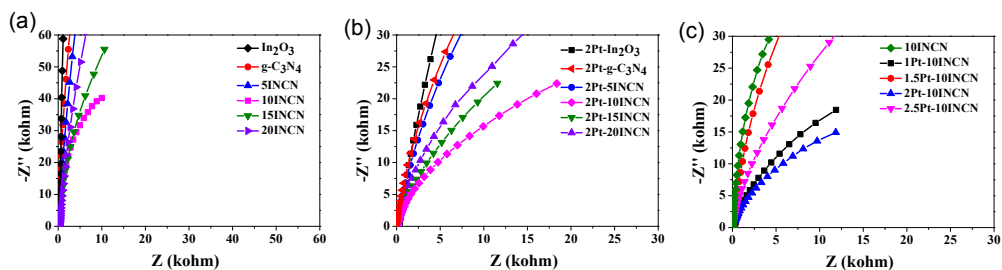

**Fig. S5** Electrochemical impedance spectra.

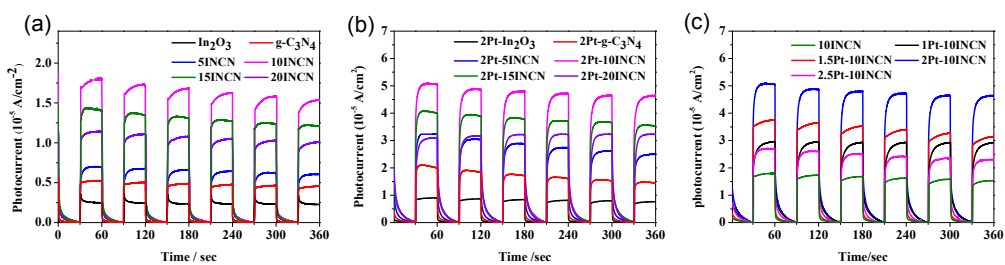

**Fig. S6** Photocurrent response spectra obtained under irradiation of a 300 W Xe lamp.



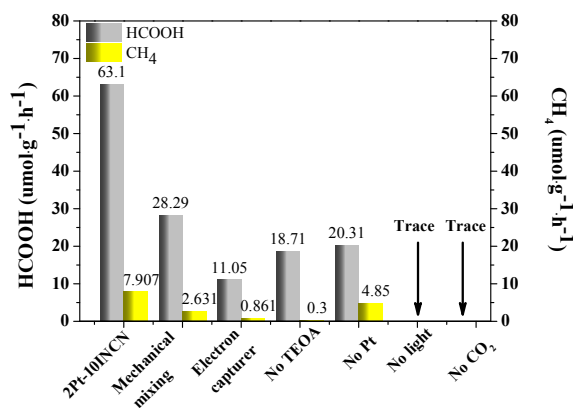

**Fig. S7** Controlled experiments for the photocatalytic CO<sub>2</sub> reduction on 2Pt-10INCN. Reaction conditions: Four 3 W LED (420 nm), 35°C, 1 atm CO<sub>2</sub>, 20 mg catalyst, 10 mL H<sub>2</sub>O, 1 mL TEOA, 4 h.

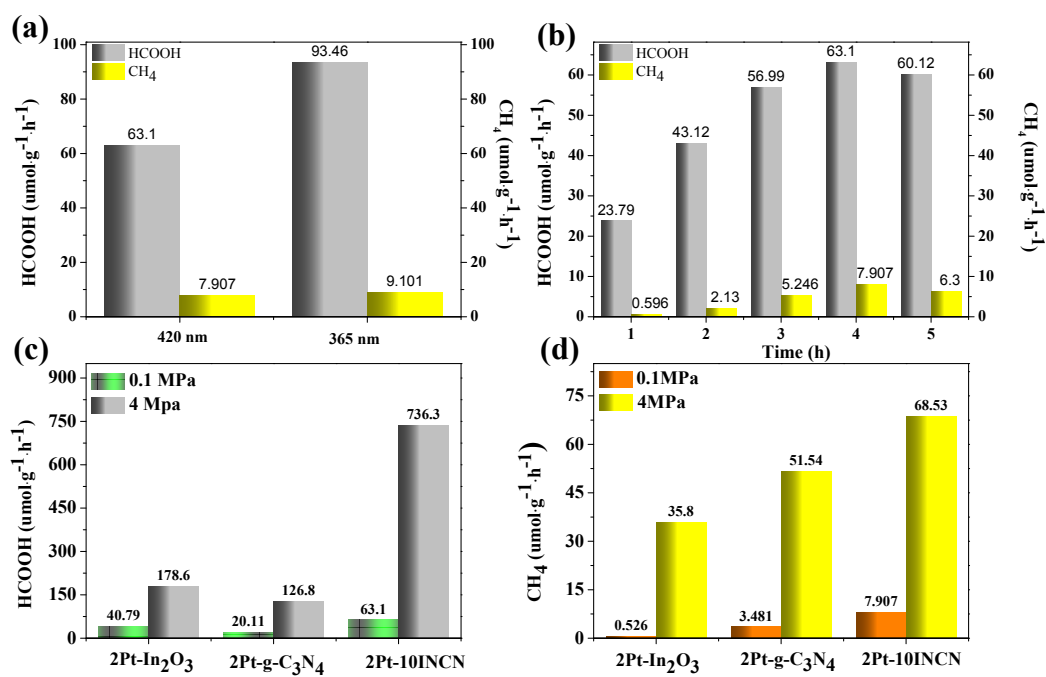

**Fig. S8** Effects of light source (a), reaction time (b) and CO<sub>2</sub> pressure (c, d) on the HCOOH and CH<sub>4</sub> yield during CO<sub>2</sub> photocatalytic reduction with different catalysts. Other reaction conditions are given in Fig. S7.

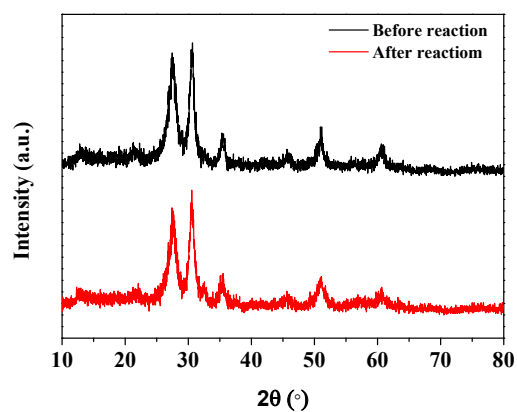

**Fig. S9** XRD patterns of 2Pt-10INCn before and after recycling reactions

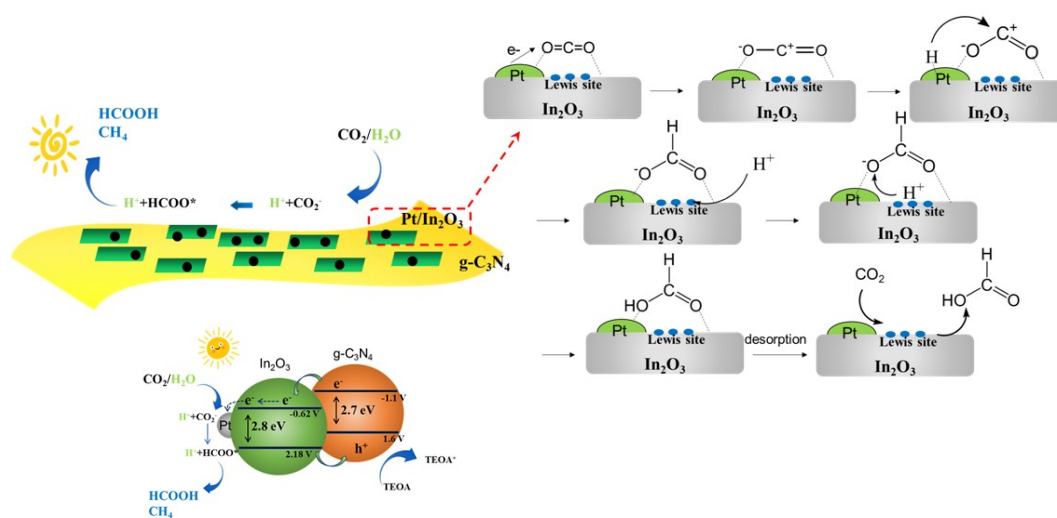

**Scheme S1** A plausible reaction pathway for photocatalytic CO<sub>2</sub> reduction to HCOOH on Pt-INCn.
